# Supplementary material for: Properties of Heat-Assisted pH Shifting and Compounded Chitosan from Insoluble Rice Peptide Precipitate and Its Application in the Curcumin-Loaded Pickering Emulsions
Source: MDPI journal article supplement (doi:10.3390/foods12244384), 2023-12-06
Supplement: s1 [file s1]

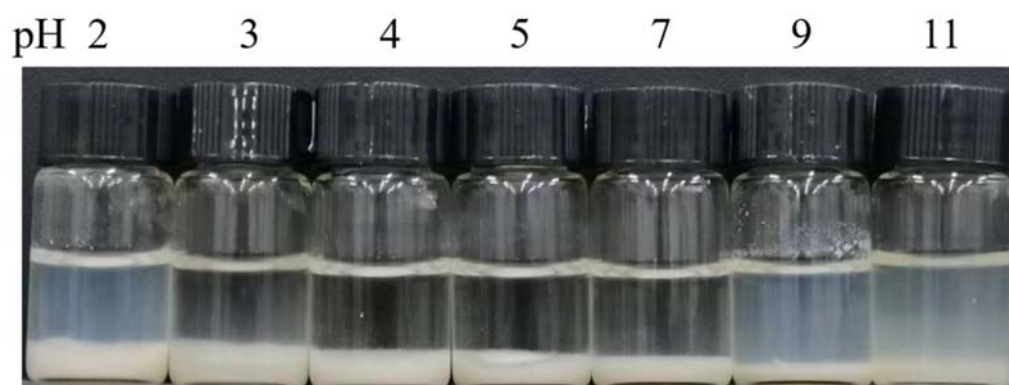

**Figure S1 The appearance diagram of insoluble peptide precipitate at different pH.**

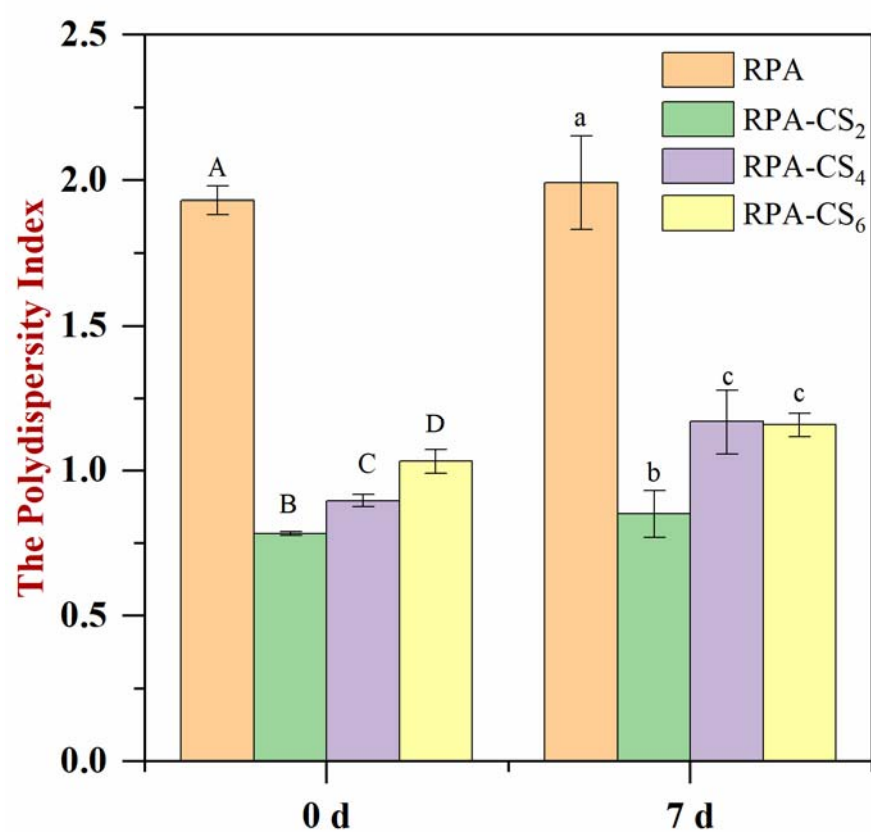

**Figure S2 The polydispersity index of the emulsions. Different letters represent significant differences between groups ( $P < 0.05$ ).**
